# Supplementary material
Source: ML conference proceedings conference paper supplement (https://openreview.net/forum?id=YAMlVKRLnc)
Supplement: supplementary_material [file attachment]

---

# ClinicalBench 使用与数据分发许可协议

---

## ClinicalLab 团队

欢迎使用ClinicalBench数据集。ClinicalBench是一个基于真实病例的端到端临床诊断评估基准，涵盖24个科室和150种疾病。为了确保数据集的道德和伦理使用，我们制定了本使用许可协议。请在下载和使用ClinicalBench数据集前，仔细阅读并同意以下条款。

## 1 定义

- “协议”指本使用许可协议的条款和条件，用于使用、复制、分发和修改ClinicalBench数据集。
- “被许可人”或“您”指您本人，或您所在的单位或代表的其他个人或实体（如您代表其签署本协议），需符合适用法律、法规或规章规定的法定年龄，并具有法律授权约束您的单位或该个人或实体。
- “ClinicalBench”指ClinicalLab团队分发的基于真实病例的评估数据集及其分发的其他元素。
- “ClinicalBench材料”统称指ClinicalLab团队根据本协议提供的ClinicalBench和文档（及其任何部分）。
- “ClinicalLab团队”或“我们”指ClinicalLab论文的研究团队，具体成员可以在论文中找到。

## 2 许可权利

通过同意本协议，您被授予非独占、全球、不可转让且免版税的有限许可，仅用于非商业的学术研究目的。您不得使用此数据集训练您的模型，但可用于评估您开发的模型或代理。您不得对 ClinicalBench 材料进行修改，并创建派生作品。您不得将数据集用于任何商业用途或再分发给第三方。

## 3 使用限制

用户同意遵守以下使用限制：

- 保护患者隐私：用户承诺保护患者隐私，避免任何可能揭示患者身份的信息泄露。
- 禁止追踪：用户不得尝试追踪或识别数据集中任何个人的信息。
- 数据安全：我们分发给您的 ClinicalBench 材料仅限您自己使用，并且必须采取适当的安全措施，防止数据集的未经授权访问或泄露。
- 研究目的：数据集仅限于非商业学术研究使用，任何其他用途需获得数据提供者的书面许可。

## 4 数据集的修改和衍生作品

用户可以使用数据集分析和评估您的模型或代理，并对数据集进行分析和处理，但不得对外发布任何形式的修改版或衍生作品。用户可在其研究成果中描述数据集的使用情况，并分享研究结果，但不得公开数据集的实际内容。

## 5 再分发

- 再分发限制：严禁被许可人再分发ClinicalBench材料（包括其任何部分或派生作品）。任何发布的项目若使用了ClinicalBench数据集，必须链接到我们的项目，而不得在您发布的项目中直接包含数据集的任何部分。所有分发的ClinicalBench数据集均根据您提交的个人信息自动生成水印，我们可以通过水印识别未经授权的分发行为，并将依法追究其法律责任。
- 归属和引用：在使用ClinicalBench材料创建的项目中，用户应在相关网站、用户界面、博客文章、论文等文档中显著展示“使用ClinicalBench评估”，并提供谷歌学术引用。

## 6 免责声明

ClinicalBench中的数据来自中国大陆，仅遵循中国大陆官方推荐的诊断方法和流程。因此，对于其他地区和国家可能缺乏代表性。ClinicalLab团队仅将ClinicalBench材料按论文中描述的处理方式“原样”提供，不提供任何形式的其他保证，不对任何形式的保证负责，包括但不限于所有权、非侵权性、适销性或适用于特定用途的任何保证。您需自行承担使用ClinicalBench材料的风险，包括但不限于使用数据集评估模型、违规使用数据训练模型造成的偏差或诊断结果错误等。在任何情况下，无论是合同、侵权、过失、产品责任或其他理论下，ClinicalLab团队均不对因本协议引起的任何损失或任何间接、特殊、后果性、附带、惩罚性或示范性损害承担责任，即使ClinicalLab团队已被告知上述可能性。ClinicalBench数据集是基于真实病例的匿名数据，ClinicalLab团队不对数据集作任何形式的保证，用户需自行承担使用数据集所产生的风险。

## 7 协议修改

ClinicalLab团队保留随时修改本协议条款的权利。任何修改将在ClinicalLab的GitHub网站上发布，并自发布之日起生效。用户有责任定期查阅协议条款，以确保了解任何变更。

## 8 期限和终止

本协议的期限自您接受本协议或访问ClinicalBench材料时开始，并将持续有效，直至根据本协议条款终止。如果您违反本协议的任何条款，ClinicalLab团队可终止本协议。协议终止后，您应删除并停止使用ClinicalBench材料。本协议第3、6和9条在协议终止后仍然有效。如用户违反本协议的任何条款，数据提供者有权立即终止用户的使用许可。用户在许可终止后，必须销毁所有已下载的数据集副本。

## 9 法律适用和管辖

本协议受中华人民共和国法律管辖、解释和执行。任何因本协议引起的争议，应首先通过友好协商解决；如协商不成，任何一方可向中华人民共和国有管辖权的法院提起诉讼，中国大陆的法院对因本协议引起的任何争议具有专属管辖权。

## 10 可接受使用政策

ClinicalLab团队致力于促进数据集的安全和公平使用，用户在下载和使用ClinicalBench数据集前，必须同意并接受本协议的所有条款。用户的下载和使用行为即视为对本协议条款的接受和遵守。

申请访问：ClinicalBench数据集采用申请访问制。用户同意本协议并提交申请后，我们将在48小时内将数据集发送到用户填写的邮箱。

请通过以下方式之一报告任何违反本政策、软件“错误”或其他可能导致违反本政策的问题：

- 报告数据问题、风险内容、错误和安全问题： Double-blind

- 报告违反可接受使用政策或未经许可使用ClinicalBench： Double-blind

如有任何问题或需进一步信息，请联系ClinicalLab团队。

#### 用户信息表

- 姓名（必填）：
- 姓氏（必填）：
- 邮箱（必填）：
- 国家（必填）：
- 所属单位（必填）：

点击下方提交即表示您同意分享您的联系信息（电子邮件和用户名）给数据集作者，并表示您接受许可条款。
